# Supplementary material
Source: publisher figshare collection journal article supplement (https://geolsoc.figshare.com/ndownloader/files/5424944)
Supplement: Supplementary file 1 [file 5424944]

	BIR-1	Rec	BHVO-1	Rec	AGV-1	Rec	GSP-2	Rec		Typical uncertainty �
Weight % Oxide										%
SiO2	48.01	47.96	49.92	49.94	58.91	58.84	66.50	66.6		0.03
TiO2	1.00	0.96	2.68	2.71	1.03	1.05	0.64	0.66		0.01
Al2O3	15.55	15.50	13.84	13.8	17.2	17.15	14.75	14.9		0.02
Fe2O3T	11.10	11.30	12.31	12.23	6.8	6.77	4.86	4.9		0.02
MnO	0.18	0.18	0.18	0.17	0.09	0.09	0.04	0.04		0.004
MgO	9.65	9.70	7.35	7.23	1.51	1.53	1.00	0.96		0.05
CaO	13.15	13.30	11.2	11.4	4.94	4.94	1.98	2.1		0.02
Na2O	1.86	1.82	2.25	2.26	4.31	4.26	2.81	2.78		0.05
K2O	0.03	0.03	0.49	0.52	2.86	2.92	5.42	5.38		0.01
P2O5	0.02	0.02	0.29	0.27	0.51	0.5	0.30	0.29		0.001
Parts per million										ppm
Rb	0.8	-	10.8	11	66.8	67	248	245		0.5
Sr	107	110	406	403	655	660	242	240		0.5
Nb	0.6	0.6	19.4	19	14.7	15	26.5	27		0.1
Zr	16.8	18	178	179	231	227	545	550		0.5
Y	15.8	16	27.8	28	19.9	20	28.2	28		0.2
Cr	366	370	277	280	9	10	18	20		1
Ni	172	170	120	119	12	16	18	17		1
Th	0.2	-	0.98	1.1	6.3	6.5	100	105		1
Ba	5	7	145	139	1218	1230	1345	1340		5
Figures in italics are information values
